# Supplementary material for: Ultrathin black TiO2 nanosheet-assembled microspheres with high stability for efficient solar-driven photocatalytic hydrogen evolution
Source: Royal Society of Chemistry journal article supplement (doi:10.1039/d2qi02596e), 2023-01-01
Supplement: d2qi02596e1.pdf [file d2qi02596e1.pdf]

## Supplementary Information

### **Ultrathin black TiO<sub>2</sub> nanosheet-assembled microspheres with high stability for efficient solar-driven photocatalytic hydrogen evolution**

Chunyan Wang, Xin Kang, Jiancong Liu,\* Dongxu Wang, Nan Wang, Jie Chen, Jing Wang, Chungui Tian, and Honggang Fu\*

† Key Laboratory of Functional Inorganic Material Chemistry Ministry of Education of the People's Republic of China, Heilongjiang University, Harbin 150080, China

Email: fuhg@hlju.edu.cn, fuhg@vip.sina.com, [jiancong@gmail.com](mailto:jiancong@gmail.com), liujiancong@hlju.edu.cn.

## The content of ESI

1. **Figure S1.** SEM patterns of the ultrathin titanate precursor.
2. **Figure S2.** XRD diffraction patterns of titanate precursor.
3. **Figure S3.** SEM patterns of the TiO<sub>2</sub>-Air (a) and TiO<sub>2</sub>-EN-Air (b), respectively.
4. **Figure S4.** XRD diffraction patterns of TiO<sub>2</sub>-Air and TiO<sub>2</sub>-EN-Air.
5. **Figure S5.** Raman spectra of TiO<sub>2</sub>-Air and TiO<sub>2</sub>-EN-Air (b).
6. **Figure S6.** XRD diffraction patterns of b-TiO<sub>2</sub>-EN calcined under 800 °C (a) and b-TiO<sub>2</sub>-EN calcined under 900 °C (b).
7. **Figure S7.** TEM patterns of the TiO<sub>2</sub>-Air (a) and TiO<sub>2</sub>-EN-Air (b), respectively.
8. **Figure S8.** N<sub>2</sub> adsorption-desorption isotherms (a) of the b-TiO<sub>2</sub> and b-TiO<sub>2</sub>-EN, respectively.
9. **Figure S9.** XPS O1s patterns of b-TiO<sub>2</sub>-EN calcined under 500 °C (a) and b-TiO<sub>2</sub>-EN calcined under 700 °C (b).
10. **Figure S10.** XPS survey spectrum of TiO<sub>2</sub>-Air and b-TiO<sub>2</sub>-EN.

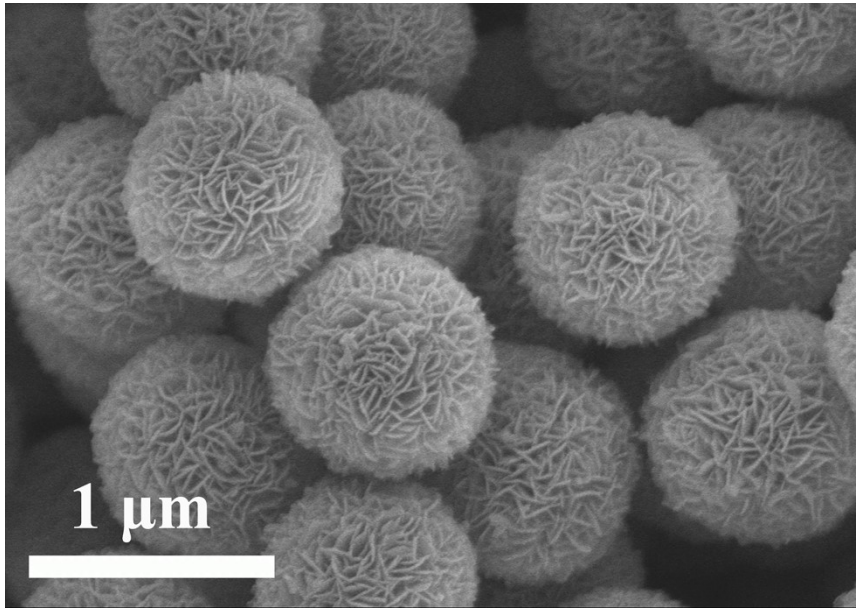

**Figure S1.** SEM patterns of the ultrathin titanate precursor.

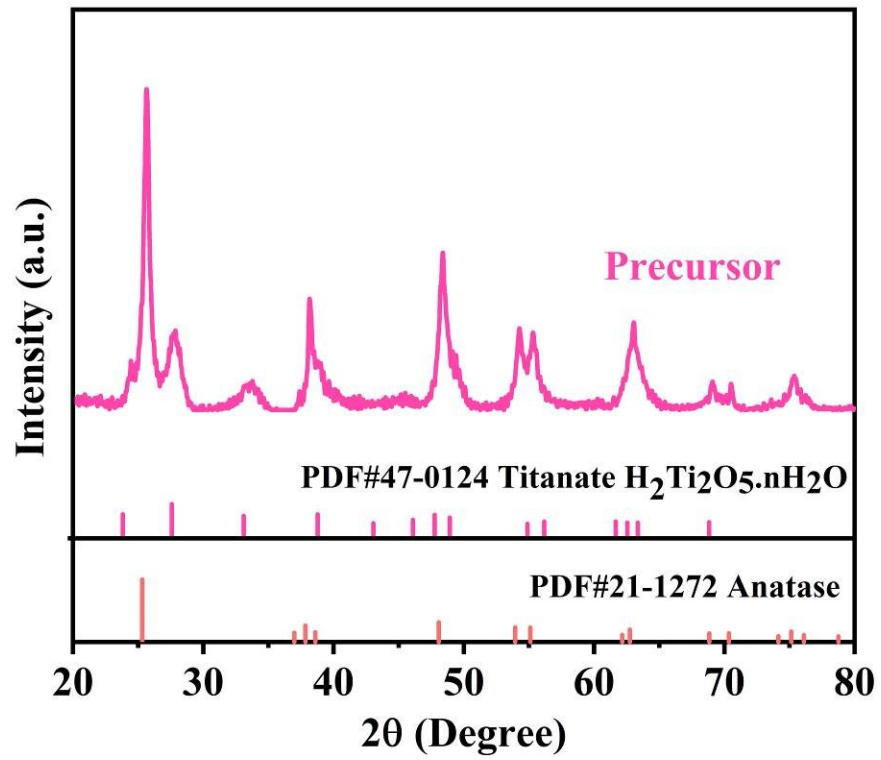

Figure S2. XRD diffraction patterns of titanate precursor.

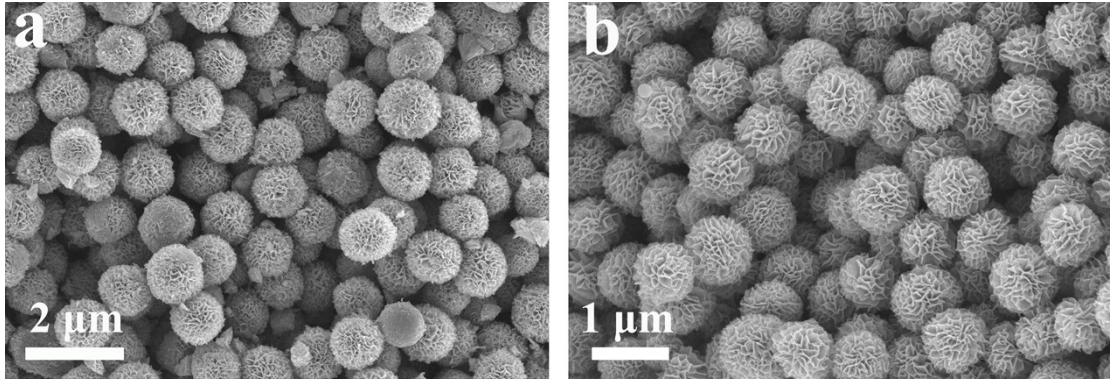

**Figure S3.** SEM patterns of the TiO<sub>2</sub>-Air (a) and TiO<sub>2</sub>-EN-Air (b), respectively.

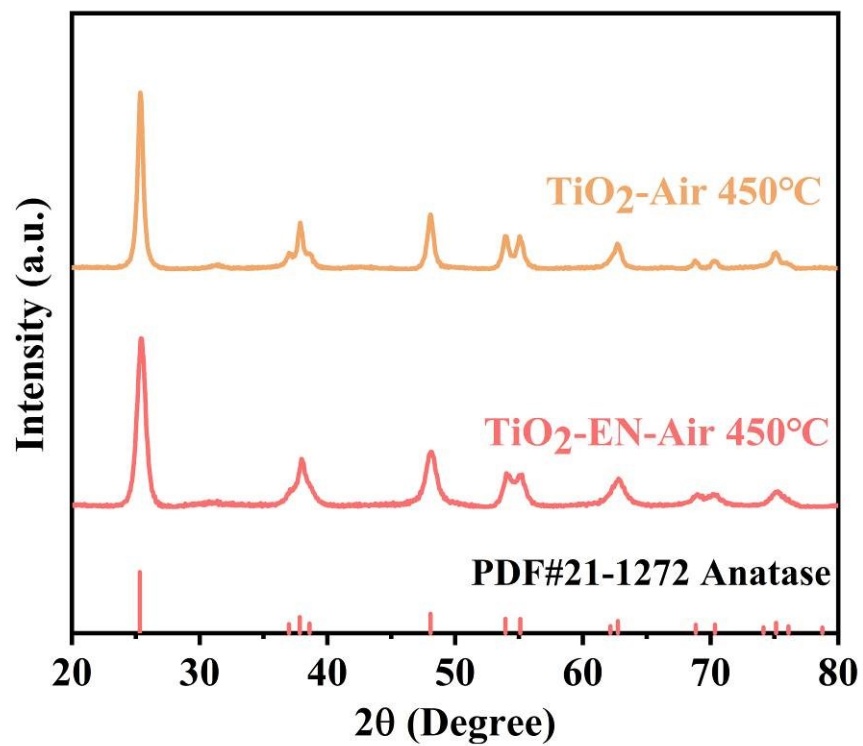

Figure S4. XRD diffraction patterns of TiO<sub>2</sub>-Air and TiO<sub>2</sub>-EN-Air.

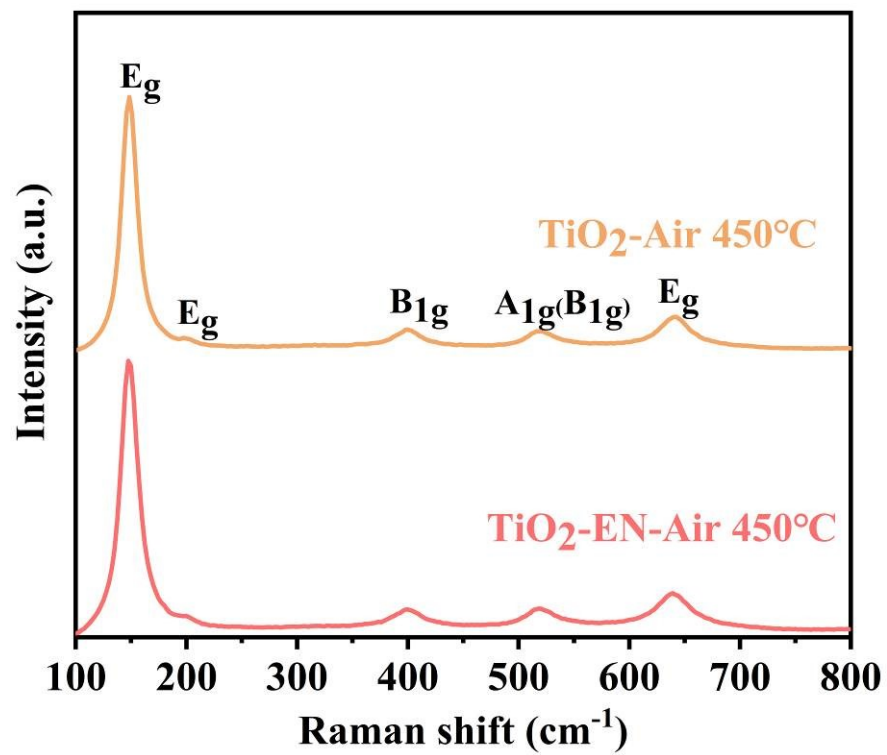

Figure S5. Raman spectra of TiO<sub>2</sub>-Air and TiO<sub>2</sub>-EN-Air.

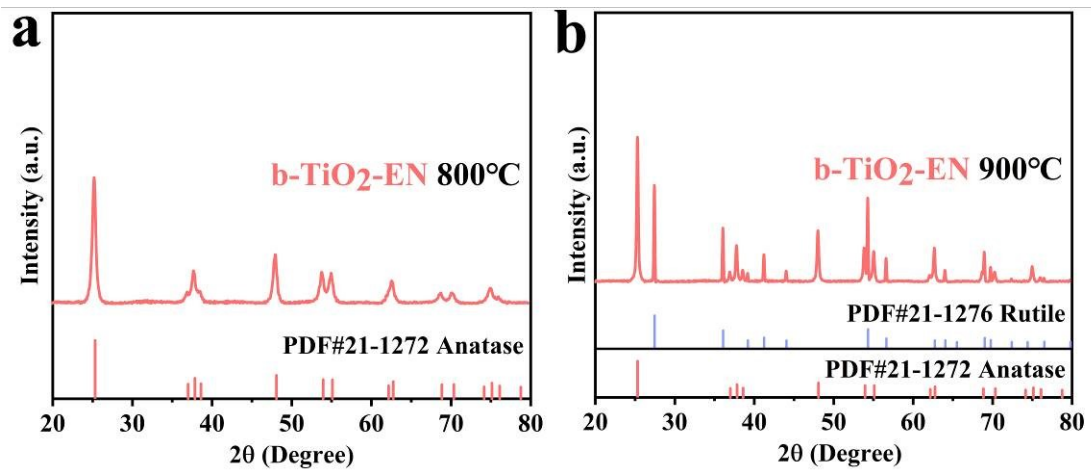

**Figure S6.** XRD diffraction patterns of b-TiO<sub>2</sub>-EN calcined under 800 °C (a) and b-TiO<sub>2</sub>-EN calcined under 900 °C (b).



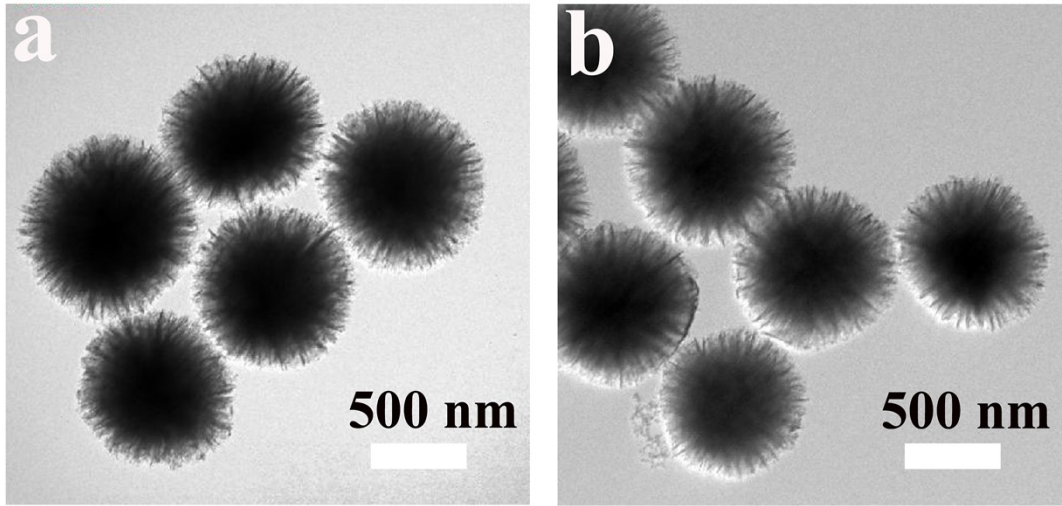

**Figure S7.** TEM patterns of the TiO<sub>2</sub>-Air (a) and TiO<sub>2</sub>-EN-Air (b), respectively.

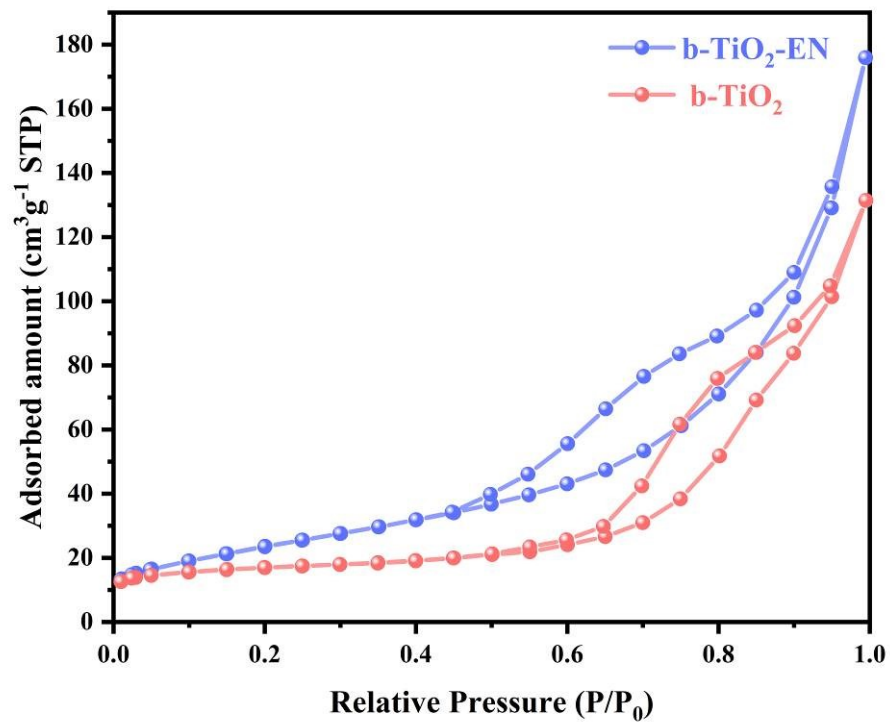

**Figure S8.** N<sub>2</sub> adsorption-desorption isotherms (a) of the b-TiO<sub>2</sub> and b-TiO<sub>2</sub>-EN, respectively.

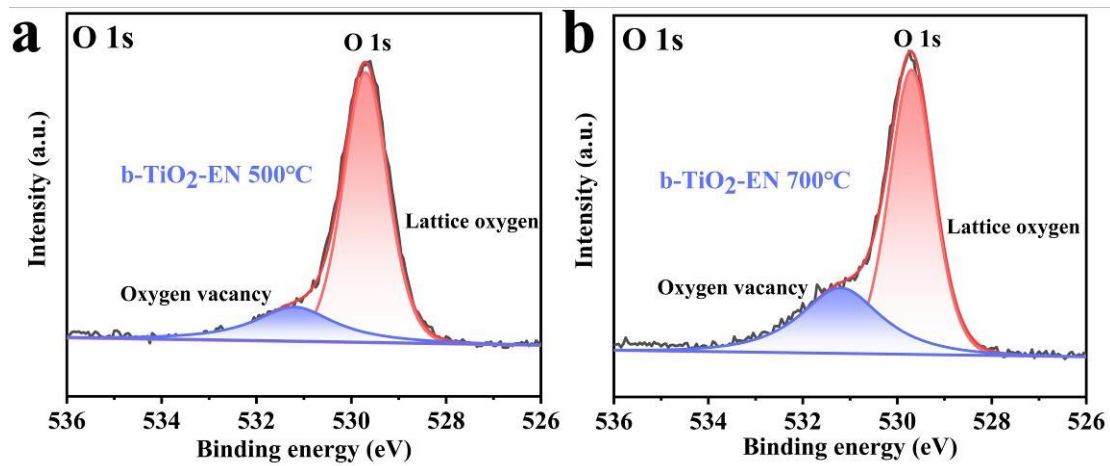

**Figure S9.** XPS O1s patterns of b-TiO<sub>2</sub>-EN calcined under 500 °C (a) and b-TiO<sub>2</sub>-EN calcined under 700 °C (b).

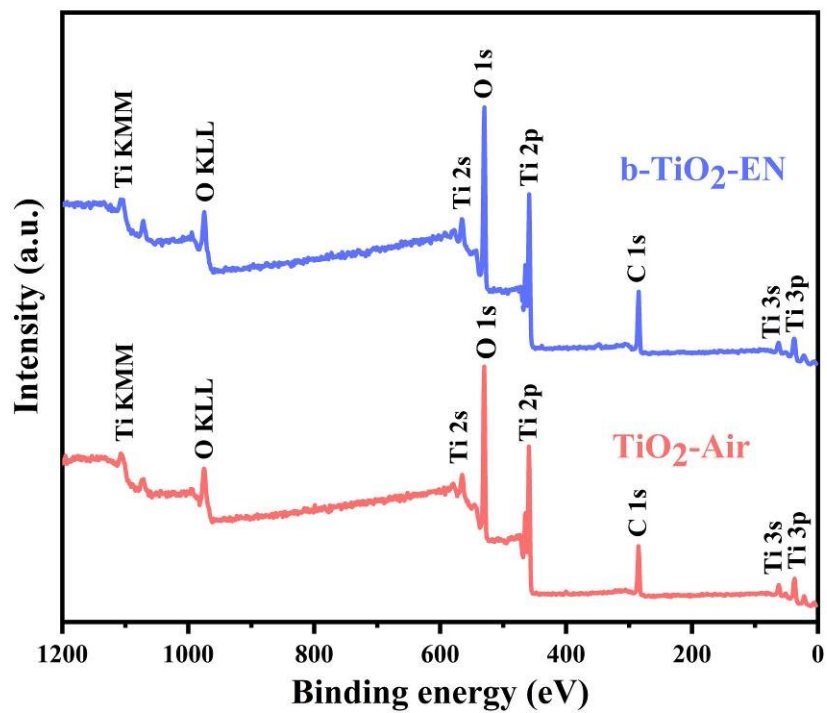

Figure S10. XPS survey spectrum of TiO<sub>2</sub>-Air and b-TiO<sub>2</sub>-EN.
